# Supplementary material for: Complete chloroplast genome structure of four Ulmus species and Hemiptelea davidii and comparative analysis within Ulmaceae species
Source: PubMed Central journal article supplement (PMC9509344; doi:10.1038/s41598-022-20184-w), 2022-09-24
Supplement: 41598_2022_20184_MOESM1_ESM.pdf [file 41598_2022_20184_MOESM1_ESM.pdf]

Table S1 species information

| Number | Species                              | Family   | Genus              | Accession Number |
|--------|--------------------------------------|----------|--------------------|------------------|
| 1      | <i>Ulmus parvifolia</i>              | Ulmaceae | <i>Ulmus</i>       | This study       |
| 2      | <i>Ulmus lamellosa</i>               | Ulmaceae | <i>Ulmus</i>       | This study       |
| 3      | <i>Ulmus pumila</i> 'zhonghuaajinye' | Ulmaceae | <i>Ulmus</i>       | This study       |
| 4      | <i>Ulmus castaneifolia</i>           | Ulmaceae | <i>Ulmus</i>       | This study       |
| 5      | <i>Hemiptelea davidii</i>            | Ulmaceae | <i>Hemiptelea</i>  | This study       |
| 6      | <i>Ulmus glabra</i>                  | Ulmaceae | <i>Ulmus</i>       | Unpublished      |
| 7      | <i>Ulmus bergmanniana</i>            | Ulmaceae | <i>Ulmus</i>       | Unpublished      |
| 8      | <i>Ulmus pumila</i>                  | Ulmaceae | <i>Ulmus</i>       | NC_032721        |
| 9      | <i>Ulmus americana</i>               | Ulmaceae | <i>Ulmus</i>       | NC_044473        |
| 10     | <i>Ulmus elongate</i>                | Ulmaceae | <i>Ulmus</i>       | NC_046061        |
| 11     | <i>Ulmus gaussenii</i>               | Ulmaceae | <i>Ulmus</i>       | NC_037840        |
| 12     | <i>Ulmus laciniata</i>               | Ulmaceae | <i>Ulmus</i>       | NC_032719        |
| 13     | <i>Ulmus macrocarpa</i>              | Ulmaceae | <i>Ulmus</i>       | NC_032720        |
| 14     | <i>Ulmus chenmouii</i>               | Ulmaceae | <i>Ulmus</i>       | NC_037758        |
| 15     | <i>Ulmus davidiana</i>               | Ulmaceae | <i>Ulmus</i>       | NC_032718        |
| 16     | <i>Ulmus lanceaefolia</i>            | Ulmaceae | <i>Ulmus</i>       | NC_058620        |
| 17     | <i>Aphananthe aspera</i>             | Ulmaceae | <i>Aphananthe</i>  | NC_039726        |
| 18     | <i>Celtis biondii</i>                | Ulmaceae | <i>Celtis</i>      | NC_039727        |
| 19     | <i>Gironniera subaequalis</i>        | Ulmaceae | <i>Gironniera</i>  | NC_039729        |
| 20     | <i>Pteroceltis tatarinowii</i>       | Ulmaceae | <i>Pteroceltis</i> | NC_039733        |
| 21     | <i>Trema orientalis</i>              | Ulmaceae | <i>Trema</i>       | NC_039734        |
| 22     | <i>Zelkova schneideriana</i>         | Ulmaceae | <i>Zelkova</i>     | NC_041074        |
| 23     | <i>Zelkova serrata</i>               | Ulmaceae | <i>Zelkova</i>     | NC_040958        |

Table S2 The potential positive selection test based on the branch-site model

| No. | Genes       | Null hypothesis |    |               | Alternative hypothesis |    |               | Significance test |             |
|-----|-------------|-----------------|----|---------------|------------------------|----|---------------|-------------------|-------------|
|     |             | lnL             | df | omega (w = 1) | lnL                    | df | omega (w > 1) | BEB               | LRT_P-value |
| 1   | <i>accD</i> | -3874.117971    | 48 | 1             | -3874.117952           | 49 | 1             |                   | 0.99508154  |
| 2   | <i>atpA</i> | -3044.791429    | 48 | 1             | -3044.724017           | 49 | 1             |                   | 0.713481864 |
| 3   | <i>atpB</i> | -2864.816249    | 48 | 1             | -2864.81626            | 49 | 2.46714       |                   | 1           |
| 4   | <i>atpE</i> | -844.361015     | 48 | 1             | -844.361015            | 49 | 1.98765       |                   | 1           |
| 5   | <i>atpF</i> | -1356.634249    | 48 | 1             | -1356.634251           | 49 | 1.69819       |                   | 1           |
| 6   | <i>atpH</i> | -475.6739       | 48 | 1             | -475.673884            | 49 | 1             |                   | 0.995486507 |
| 7   | <i>atpI</i> | -1473.108736    | 48 | 1             | -1473.108743           | 49 | 1.60162       |                   | 1           |
| 8   | <i>ccsA</i> | -2544.054903    | 48 | 1             | -2544.054909           | 49 | 1             |                   | 1           |
| 9   | <i>cemA</i> | -1686.140457    | 48 | 1             | -1686.140477           | 49 | 2.37918       |                   | 1           |
| 10  | <i>clpP</i> | -1252.029962    | 48 | 1             | -1252.029962           | 49 | 1             |                   | 1           |
| 11  | <i>matK</i> | -4483.327829    | 48 | 1             | -4483.327747           | 49 | 1             |                   | 0.989782371 |
| 12  | <i>ndhA</i> | -2387.920139    | 48 | 1             | -2387.920145           | 49 | 2.34564       |                   | 1           |
| 13  | <i>ndhB</i> | -2137.375866    | 48 | 1             | -2137.37587            | 49 | 2.04795       |                   | 1           |
| 14  | <i>ndhD</i> | -4236.652012    | 48 | 1             | -4236.65216            | 49 | 5.60728       |                   | 1           |
| 15  | <i>ndhE</i> | -586.649861     | 48 | 1             | -586.649861            | 49 | 1             |                   | 1           |
| 16  | <i>ndhF</i> | -6427.359057    | 48 | 1             | -6427.359057           | 49 | 1             |                   | 1           |
| 17  | <i>ndhG</i> | -1336.095405    | 48 | 1             | -1336.095396           | 49 | 1             |                   | 0.996614873 |
| 18  | <i>ndhH</i> | -2575.267307    | 48 | 1             | -2575.267323           | 49 | 1.51179       |                   | 1           |
| 19  | <i>ndhI</i> | -1074.541696    | 48 | 1             | -1074.541697           | 49 | 1.97447       |                   | 1           |
| 20  | <i>ndhJ</i> | -983.505982     | 48 | 1             | -983.505986            | 49 | 1.63901       |                   | 1           |
| 21  | <i>ndhK</i> | -1502.513198    | 48 | 1             | -1502.513198           | 49 | 1             |                   | 1           |
| 22  | <i>petA</i> | -2255.731352    | 48 | 1             | -2255.731342           | 49 | 1             |                   | 0.996431764 |
| 23  | <i>petB</i> | -1233.618713    | 48 | 1             | -1233.61869            | 49 | 1             |                   | 0.994588525 |
| 24  | <i>petD</i> | -943.679775     | 48 | 1             | -943.679775            | 49 | 5.21947       |                   | 1           |
| 25  | <i>petG</i> | -198.330603     | 48 | 1             | -198.330603            | 49 | 2.42736       |                   | 1           |
| 26  | <i>petL</i> | -198.375811     | 48 | 1             | -198.375811            | 49 | 1             |                   | 1           |
| 27  | <i>petN</i> | -168.959407     | 48 | 1             | -168.959407            | 49 | 1             |                   | 1           |
| 28  | <i>psaA</i> | -4169.025102    | 48 | 1             | -4169.025137           | 49 | 2.29811       |                   | 1           |
| 29  | <i>psaB</i> | -4010.413208    | 48 | 1             | -4010.413285           | 49 | 1.09444       |                   | 1           |
| 30  | <i>psaC</i> | -423.002257     | 48 | 1             | -423.002257            | 49 | 2.02226       |                   | 1           |
| 31  | <i>psaI</i> | -211.093876     | 48 | 1             | -211.093876            | 49 | 1             |                   | 1           |
| 32  | <i>psaJ</i> | -277.698808     | 48 | 1             | -277.698808            | 49 | 1.6791        |                   | 1           |
| 33  | <i>psbA</i> | -2282.33528     | 48 | 1             | -2282.335271           | 49 | 1             |                   | 0.996614873 |
| 34  | <i>psbB</i> | -2997.91126     | 48 | 1             | -2997.911283           | 49 | 1             |                   | 1           |

|    |              |              |    |   |              |    |         |             |
|----|--------------|--------------|----|---|--------------|----|---------|-------------|
| 35 | <i>rps19</i> | -412.644098  | 48 | 1 | -412.644099  | 49 | 1       | 1           |
| 36 | <i>rps2</i>  | -1432.587016 | 48 | 1 | -1432.587046 | 49 | 1.80093 | 1           |
| 37 | <i>rps3</i>  | -1643.233959 | 48 | 1 | -1643.233967 | 49 | 2.26806 | 1           |
| 38 | <i>rps4</i>  | -1316.585727 | 48 | 1 | -1316.585723 | 49 | 1.09787 | 0.997743245 |
| 39 | <i>rps7</i>  | -682.658149  | 48 | 1 | -682.658149  | 49 | 2.21764 | 1           |
| 40 | <i>rps8</i>  | -1022.087003 | 48 | 1 | -1022.087003 | 49 | 1.8015  | 1           |
| 41 | <i>rps18</i> | -597.085368  | 48 | 1 | -597.085367  | 49 | 2.264   | 0.998871621 |
| 42 | <i>ycf1</i>  | -19016.8542  | 48 | 1 | -19016.85486 | 49 | 1       | 1           |
| 43 | <i>ycf2</i>  | -11470.53597 | 48 | 1 | -11470.536   | 49 | 1.75119 | 1           |
| 44 | <i>ycf3</i>  | -1013.486751 | 48 | 1 | -1013.486754 | 49 | 2.08366 | 1           |
| 45 | <i>ycf4</i>  | -1296.721459 | 48 | 1 | -1295.122438 | 49 | 1       | 0.073726488 |

---

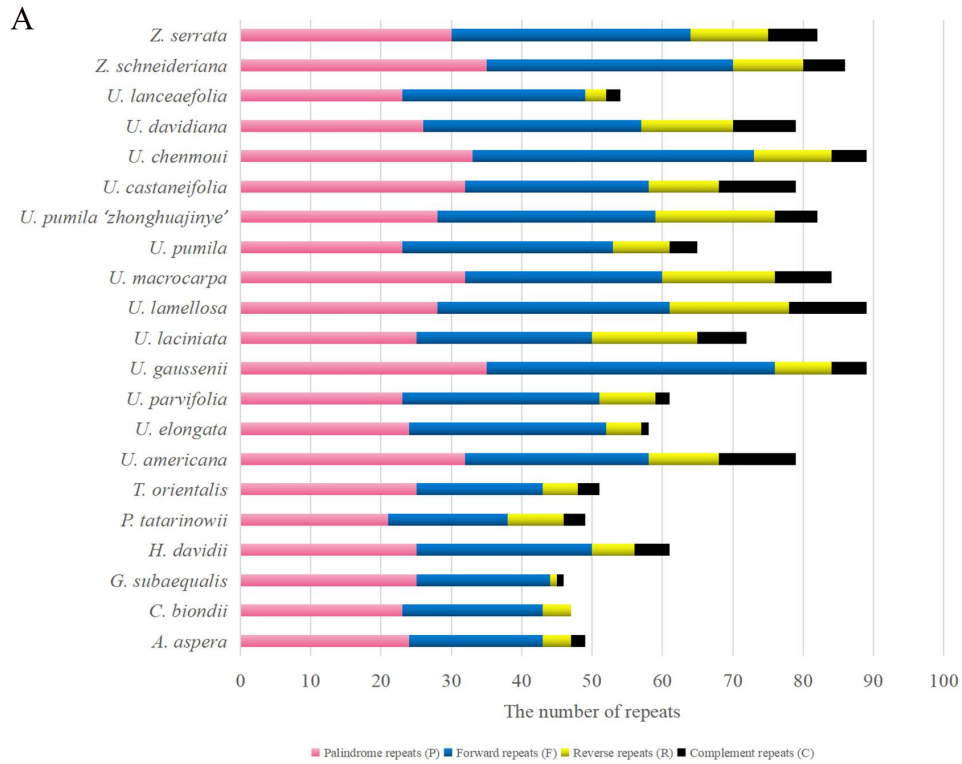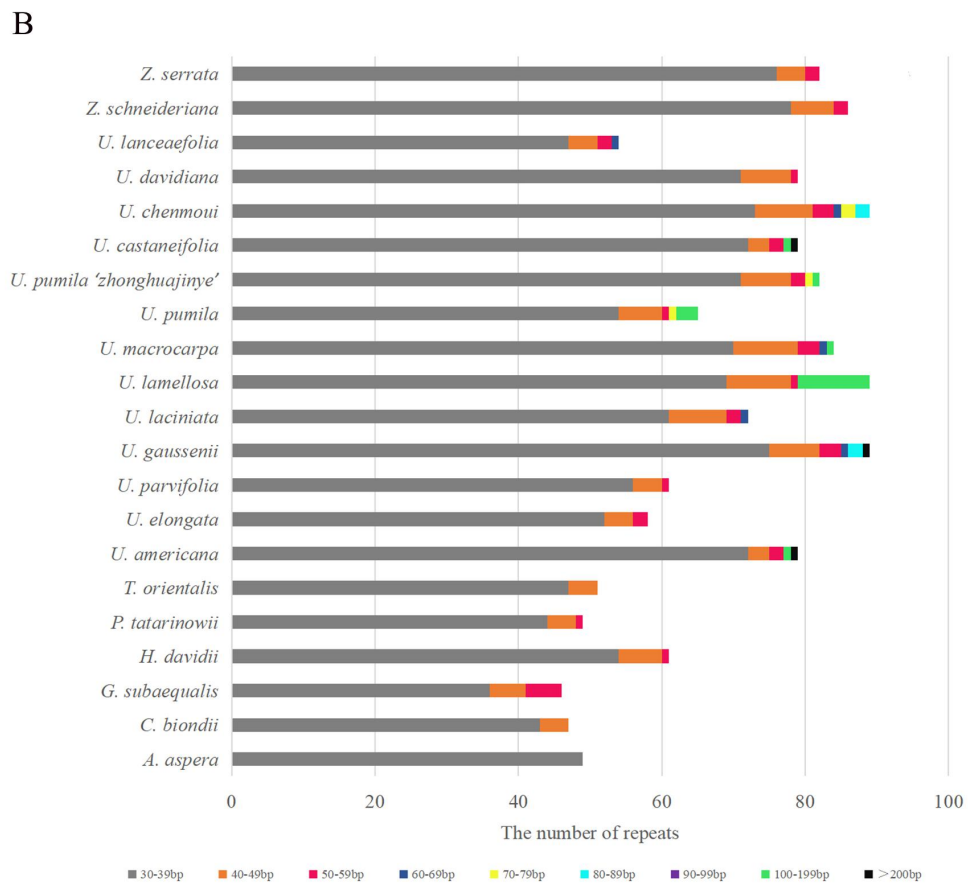

Figure S1. Analysis of repeats in 21 Ulmaceae species chloroplast genomes, (A) Number of Palindromic repeat, Direct repeat, Reverse repeat, Complement repeat; (B) Number of tandem repeats in different lengths.
